# Supplementary material for: Clinical Utility of Myxovirus resistance protein A (MxA) for Differentiation Between Viral and Bacterial Infection in Adult Acute Care: A prospective study
Source: Research Square preprint supplement (doi:10.21203/rs.3.rs-8238199/v1), 2025-12-11
Supplement: Supplementary file 1 [file 421c88a96d89876908e8de63.docx]

# Supplemental Material 1 – Definitions of confirmed or suspected infection and non-infection

A confirmed infection was defined as an infection with an identified causative pathogen. The study protocol did not include any predetermined microbial testing. The choice of when to perform the test and which tests to carry out was made by the treating physician. The following tests were considered diagnostic for bacterial infections: blood cultures or bacterial cultures from other sampling site (e.g. urine, sputum, skin, stool, effusions or other appropriate materials), broad-spectrum – Multiplex PCR (detecting *Influenza A, Influenza B, Respiratory syncitial virus, Adenovirus, Bocavirus, Rhinovirus, Enterovirus* and *Parainfluenza virus*) or BioFire Pneumonia plus PCR detecting (detecting *A. baumanii complex, E. cloacae, E. coli, H. inlfuenzae, Klebsiella spp., M. catarrhalis, Proteus spp., P. aeruginosa, S. aureus, Adenovirus, Coronavirus, Human metapneumovirus, Rhinovirus, Enterovirus, Influenza A, Influenza B, SARS-CoV-2 virus, Parainfluenza virus* and *Respiratory syncitial virus*) or pathogen-specific polymerase chain-reaction (PCR), antigen determination for *Clostridium difficile* toxin and urine antigen testing for *Streptococcus pneumoniae* and *Legionella pneumophila*. A positive serology result accompanied by relevant clinical symptoms was also considered a confirmed case of atypical pneumonia. PCR testing (either broad-spectrum or pathogen-specific) was primarily used for the purpose of diagnosing viral infections. A positive antigen test result for either COVID-19, influenza A or B, or respiratory syncytial virus was considered diagnostic only if appropriate clinical findings were also present. If no pathogens were detected, a clinical diagnosis of infection was based on the patient's medical history, clinical findings and the results of common laboratory tests and imaging scans (such as C-reactive protein, procalcitonin, blood cell count and urinary sediment analysis, as well as chest X-rays and computed tomography scans). The definitive distinction between clinically diagnosed viral and bacterial infections was made by evaluating the clinical course of the disease, the potential need for subsequent antibiotic prescription, and the dynamics of inflammatory markers. Patients who were suspected of having an infection on admission, but were found not to have one during their hospitalisation, were classified as non-infectious.

|  | | **bacterial infection** | | **viral infection** | | **co-infection** | |
| --- | --- | --- | --- | --- | --- | --- | --- |
| **Subtype of infection** | **total number of infections** (%) | clinically diagnosed  **n=169** | confirmed  **n=320** | clinically diagnosed  **n=59** | confirmed  **n=81** | clinically diagnosed  **n=26** | confirmed  **n=22** |
| Upper respiratory tract infections | 27 (4) | 0 | 0 | 19 | 2 | 6 | 0 |
| Lower respiratory tract infections | 273 (39) | 76 | 61 | 23 | 72 | 20 | 21 |
| Urinary tract infections | 169 (24) | 23 | 140 | 0 | 0 | 2 | 4 |
| Gastrointestinal tract infections | 28 (4) | 3 | 11 | 12 | 2 | 0 | 0 |
| Biliary tract infections | 33 (5) | 14 | 19 | 0 | 0 | 0 | 0 |
| Other intra-abdominal infections | 7 (1) | 1 | 5 | 0 | 1 | 0 | 0 |
| Central nervous system infections | 8 (1) | 0 | 2 | 2 | 4 | 0 | 0 |
| Skin and soft tissue infections | 81 (12) | 25 | 55 | 0 | 0 | 1 | 0 |
| Bone and joint infections | 15 (2) | 4 | 10 | 0 | 0 | 1 | 0 |
| Bloodstream infections | 8 (1) | 2 | 6 | 0 | 0 | 0 | 0 |
| Other infections | 44 (6) | 22 | 18 | 3 | 1 | 0 | 0 |

# Table S1 – Subtypes of infections in the study population

*Table S1 – Subtypes of infections. Gastrointestinal tract infections included gastroenteritis and/or colitis. Biliary tract infections included acute cholangitis and cholecystitis. Other intra-abdominal infections included hepatic abscess (n=4), appendicitis (n=2) and viral hepatitis (n=1)*. *Central nervous system infections included encephalitis and/or meningitis. Bloodstream infections included infective endocarditis (n=7) and catheter-related bloodstream infection (n=1). Other infections included mediastinitis (n=1), odontogenic infections (n=3), HIV infection (n=1) and infections of unknown origin (n=39). The higher total number of infections reflects the fact that some patients had infections at multiple sites.*

# Table S2 – Baseline characteristics in different patient groups

| **Characteristic** | **bacterial infection**  **n=489** | **viral infection**  **n=140** | **co-infection**  **n=48** | **non-infection**  **n=190** |
| --- | --- | --- | --- | --- |
| **Age – years** | 76 (66-84) | 76 (66-82) | 70 (55-80) | 74 (60-82) |
| **Sex – no. (%)** | | | | |
| male | 260 (53,2) | 69 (49,3) | 25 (52,1) | 108 (56,8) |
| female | 229 (46,8) | 71 (50,7) | 23 (47,9) | 82 (43,2) |
| **Coexisting condition – no. (%)** | | | | |
| COPD | 80 (16,4) | 27 (19,3) | 7 (14,6) | 29 (15,3) |
| Diabetes | 194 (39,7) | 45 (32,1) | 17 (35,4) | 56 (29,5) |
| CKD | 146 (29,9) | 23 (16,4) | 10 (20,8) | 46 24,2) |
| Immunosuppression | 49 (10) | 12 (8,6) | 7 (14,6) | 20 (10,5) |
| Chronic heart failure | 149 (30,5) | 30 (21,4) | 11 (22,9) | 47 (24,7) |
| Coronary artery disease | 106 (21,7) | 28 (20) | 10 (20,8) | 35 (18,4) |
| Cirrhosis | 20 (4,1) | 3 (2,1) | 1 (2,1) | 9 (4,7) |
| Cancer (solid, total) | 91 (18,6) | 5 (3,6) | 7 (14,6) | 42 (22,1) |
| Cancer (solid, active) | 60 (12,3) | 4 (2,9) | 2 (4,2) | 35 (18,4) |
| Cancer (hematologic, total) | 21 (4,3) | 8 (5,7) | 1 (2,1) | 14 (7,4) |
| Cancer (hematologic, active) | 16 (3,3) | 6 (4,3) | 1 (2,1) | 10 (5,3) |
| **qSOFA score – no. (%)** | | | | |
| 0 and 1 (negative) | 291 (59,5) | 130 (92,9) | 32 (6,7) | 190 (100) |
| 2 and 3 (positive) | 198 (40,5) | 10 (7,1) | 16 (3,3) | 0 (0) |

*Table S2 – Baseline characteristics in different patient groups. COPD – Chronic Obstructive Pulmonary Disease. CKD – Chronic Kidney Disease. qSOFA – quick Sepsis-Related Organ Failure Assessment.*

| **Characteristic** | **bacterial infection** | **viral infection** | **co-infection** | **non-infection** | **p value** |
| --- | --- | --- | --- | --- | --- |
| **Blood Count Differential** | | | | | |
| WBC (x109/L) | 11,8 (8,8-16,5) | 8,6 (6,3-10,8) | 9,2 (7,2-12,5) | 10,4 (7,7-13,8) | 0.03* |
| Neutrophils (%) | 76 (66-84) | 68 (60-80) | 85 (74-89) | 71 (63-81) | 0.74 |
| Lymphocytes (%) | 12 (7-20) | 19 (11-25) | 8 (5-15) | 16 (11-21) | 0.25 |
| NLR | 6,2 (3,4-12,4) | 3,7 (2,3-7,2) | 10,7 (5,2-17,1) | 4,1 (2,7-6,9) | 0.41 |
| Platelets (x109/L) | 229 (173-306) | 203 (164-260) | 228 (154-303) | 251 (191-335) | <0.001* |
| ICIS | 2 (1-4) | 1 (0-2) | 2 (1-5) | 1 (0-2) | <0.001* |
| **Biochemistry** | | | | | |
| MxA (µg/L) | 1 (1-6) | 82 (24-179) | 85 (44-249) | 1 (1-2) | <0.001* |
| C-reactive protein (mg/L) | 88 (31-171) | 35 (11-68) | 95 (42-189) | 15 (4-48) | <0.001* |
| Procalcitonin (µg/L) | 0,45 (0,16-1,84) | 0,11 (0,06-0,18) | 0,52 (0,19-1,52) | 0,08 (0,05-0,16) | <0.001* |
| Creatinine (µ mol/L) | 116 (84-185) | 90 (70-111) | 107 (79-156) | 95 (69-146) | <0.001* |
| Bilirubin (µ mol/L) | 12 (8-19) | 11 (8-13) | 12 (8-16) | 12 (7-16) | 0.02* |
| Lactate (mmol/L) | 1,7 (1,1-2,6) | 1,3 (0,9-1,9) | 1,7 (1,1-2,4) | 2 (1,3-3,7) | 0.09 |
| **Coagulation** | | | | | |
| aPTT (seconds) | 30,4 (27,3-35,2) | 30,5 (27,7-35) | 33,9 (29,5-38,9) | 29,1 (26,3-33,3) | 0.34 |
| PT (seconds) | 13,4 (12-15,7) | 12,5 (11,5-13,c3) | 13,2 (12,1-14,5) | 12,8 (11,3-14,6) | 0.54 |

# Tables S31-15 – Laboratory results of selected parameters

*Table S31 – Laboratory results of selected parameters. Displayed p values represent results of the intergroup comparison. * p value for significant differences between groups. WBC – White Blood Count. NLR – Neutrophil to Lymphocyte Ratio. ICIS – Intensive Care Infection Score. MxA – Myxovirus protein A. aPTT – activated Partial Tromboplastin Time. PT - Prothrombin Time*

| **WBC** | bacterial infection | viral infection | co-infection | non-infection |
| --- | --- | --- | --- | --- |
| bacterial infection |  | p = 0.01 | p = 0.97 | p = 0.04 |
| viral infection | p = 0.01 |  | p = 0.14 | p = 0.47 |
| co-infection | p = 0.97 | p= 0.14 |  | p = 0.30 |
| non-infection | p = 0.04 | p= 0.47 | p = 0.30 |  |

*Table S32 – Results of post-hoc Dunn’s test using Bonferroni-corrected alpha value for WBC. Significant p-values in green.*

| **Neutrophils** | bacterial infection | viral infection | co-infection | non-infection |
| --- | --- | --- | --- | --- |
| bacterial infection |  | p = 0.85 | p = 0.83 | p = 0.30 |
| viral infection | p = 0.85 |  | p = 0.76 | p = 0.32 |
| co-infection | p = 0.83 | p = 0. 76 |  | p = 0.67 |
| non-infection | p = 0.30 | p = 0.32 | p = 0.67 |  |

*Table S33 – Results of post-hoc Dunn’s test using Bonferroni-corrected alpha value for neutrophils. Significant p-values in green.*

| **Lymphocytes** | bacterial infection | viral infection | co-infection | non-infection |
| --- | --- | --- | --- | --- |
| bacterial infection |  | p = 0.15 | p = 0.69 | p = 0.13 |
| viral infection | p = 0.15 |  | p = 0.25 | p = 0.89 |
| co-infection | p = 0.69 | p = 0.25 |  | p = 0.21 |
| non-infection | p = 0.13 | p = 0.89 | p = 0.21 |  |

*Table S34 – Results of post-hoc Dunn’s test using Bonferroni-corrected alpha value for lymphocytes. Significant p-values in green.*

| **NLR** | bacterial infection | viral infection | co-infection | non-infection |
| --- | --- | --- | --- | --- |
| bacterial infection |  | p = 0.50 | p = 0.15 | p = 0.97 |
| viral infection | p = 0.50 |  | p = 0.09 | p = 0.57 |
| co-infection | p = 0.15 | p = 0.09 |  | p = 0.21 |
| non-infection | p = 0.97 | p = 0.57 | p = 0.21 |  |

*Table S35 – Results of post-hoc Dunn’s test using Bonferroni-corrected alpha value for NLR. Significant p-values in green.*

| **Platelets** | bacterial infection | viral infection | co-infection | non-infection |
| --- | --- | --- | --- | --- |
| bacterial infection |  | p < 0.005 | p = 0.52 | p = 0.02 |
| viral infection | p < 0.005 |  | p = 0.27 | p<0.001 |
| co-infection | p = 0.52 | p = 0.27 |  | p=0.07 |
| non-infection | p = 0.02 | p<0.001 | p=0.07 |  |

*Table S36 – Results of post-hoc Dunn’s test using Bonferroni-corrected alpha value for platelets. Significant p-values in green.*

| **ICIS** | bacterial infection | viral infection | co-infection | non-infection |
| --- | --- | --- | --- | --- |
| bacterial infection |  | p < 0.001 | p = 0.65 | p < 0.001 |
| viral infection | p < 0.001 |  | p < 0.001 | p = 0.93 |
| co-infection | p = 0.65 | p < 0.001 |  | p < 0.001 |
| non-infection | p < 0.001 | p = 0.93 | p < 0.001 |  |

*Table S37 – Results of post-hoc Dunn’s test using Bonferroni-corrected alpha value for ICIS. Significant p-values in green.*

| **MxA** | bacterial infection | viral infection | co-infection | non-infection |
| --- | --- | --- | --- | --- |
| bacterial infection |  | p < 0.001 | p < 0.001 | p = 0.05 |
| viral infection | p < 0.001 |  | p = 0.41 | p < 0.001 |
| co-infection | p < 0.001 | p = 0.41 |  | p < 0.001 |
| non-infection | p = 0.05 | p < 0.001 | p < 0.001 |  |

*Table S38 – Results of post-hoc Dunn’s test using Bonferroni-corrected alpha value for MxA. Significant p-values in green.*

| **C-reactive protein** | bacterial infection | viral infection | co-infection | non-infection |
| --- | --- | --- | --- | --- |
| bacterial infection |  | p < 0.001 | p = 0.30 | p < 0.001 |
| viral infection | p < 0.001 |  | p < 0.001 | p < 0.005 |
| co-infection | p = 0.30 | p < 0.001 |  | p < 0.001 |
| non-infection | p < 0.001 | p < 0.005 | p < 0.001 |  |

*Table S39 – Results of post-hoc Dunn’s test using Bonferroni-corrected alpha value for C-reactive protein. Significant p-values in green.*

| **Procalcitonin** | bacterial infection | viral infection | co-infection | non-infection |
| --- | --- | --- | --- | --- |
| bacterial infection |  | p < 0.001 | p = 0.91 | p < 0.001 |
| viral infection | p < 0.001 |  | p < 0.001 | p = 0.45 |
| co-infection | p = 0.91 | p < 0.001 |  | p < 0.001 |
| non-infection | p < 0.001 | p = 0.45 | p < 0.001 |  |

*Table S310 – Results of post-hoc Dunn’s test using Bonferroni-corrected alpha value for procalcitonin. Significant p-values in green.*

| **Creatinine** | bacterial infection | viral infection | co-infection | non-infection |
| --- | --- | --- | --- | --- |
| bacterial infection |  | p < 0.001 | p = 0.27 | p < 0.001 |
| viral infection | p < 0.001 |  | p = 0.03 | p = 0.18 |
| co-infection | p = 0.27 | p = 0.03 |  | p = 0.17 |
| non-infection | p < 0.001 | p = 0.18 | p = 0.17 |  |

*Table S311 – Results of post-hoc Dunn’s test using Bonferroni-corrected alpha value for creatinine. Significant p-values in green.*

| **Bilirubin** | bacterial infection | viral infection | co-infection | non-infection |
| --- | --- | --- | --- | --- |
| bacterial infection |  | p < 0.005 | p = 0.62 | p = 0.13 |
| viral infection | p < 0.005 |  | p = 0.18 | p = 0.13 |
| co-infection | p = 0.62 | p = 0.18 |  | p = 0.74 |
| non-infection | p = 0.13 | p = 0.13 | p = 0.74 |  |

*Table S312 – Results of post-hoc Dunn’s test using Bonferroni-corrected alpha value for bilirubin. Significant p-values in green.*

| **Lactate** | bacterial infection | viral infection | co-infection | non-infection |
| --- | --- | --- | --- | --- |
| bacterial infection |  | p = 0.21 | p = 0.54 | p = 0.08 |
| viral infection | p = 0.21 |  | p = 0.81 | p = 0.02 |
| co-infection | p = 0.54 | p = 0.81 |  | p = 0.12 |
| non-infection | p = 0.08 | p = 0.02 | p = 0.12 |  |

*Table S313 – Results of post-hoc Dunn’s test using Bonferroni-corrected alpha value for lactate. Significant p-values in green.*

| **aPTT** | bacterial infection | viral infection | co-infection | non-infection |
| --- | --- | --- | --- | --- |
| bacterial infection |  | p = 0.84 | p = 0.14 | p = 0.40 |
| viral infection | p = 0.84 |  | p = 0.22 | p = 0.42 |
| co-infection | p = 0.14 | p = 0.22 |  | p = 0.07 |
| non-infection | p = 0.40 | p = 0.42 | p = 0.07 |  |

*Table S314 – Results of post-hoc Dunn’s test using Bonferroni-corrected alpha value for aPTT. Significant p-values in green.*

| **PT** | bacterial infection | viral infection | co-infection | non-infection |
| --- | --- | --- | --- | --- |
| bacterial infection |  | p = 0.25 | p = 0.98 | p = 0.26 |
| viral infection | p = 0.25 |  | p = 0.50 | p = 0.89 |
| co-infection | p = 0.98 | p = 0.50 |  | p = 0.55 |
| non-infection | p = 0.26 | p = 0.89 | p = 0.55 |  |

*Table S315 – Results of post-hoc Dunn’s test using Bonferroni-corrected alpha value for PT. Significant p-values in green.*

| **predictors** | **regression coefficient (β)** | **DF (Degree of Freedom)** | **SE (Standard Error)** | **Wald Chi-Square test** | **p value** |
| --- | --- | --- | --- | --- | --- |
| intercept | 0.340 | 1 | 0.039 | 76.39 | < 0.001 |
| C-reactive protein | -0.001 | 1 | 0.001 | 12.28 | < 0.001 |
| procalcitonin | -0.002 | 1 | 0.001 | 2.26 | 0.13 |
| MxA protein | 0.002 | 1 | 0.001 | 210.88 | < 0.001 |
| leukocytes | -0.005 | 1 | 0.002 | 11.23 | < 0.001 |
| thrombocytes | -0-001 | 1 | 0.001 | 1.11 | 0.29 |

# Tables S4 – Results of the multivariate logistic regression analysis

*Table S4 – Results of the multivariate logistic regression analysis.*

# Table S5 – MxA values in non-respiratory viral infections

| **causative viral agens** | **number of patients** | **MxA value (µg/l)** |
| --- | --- | --- |
| active hepatitis B | 1 | <1 |
| herpes simplex virus encephalitis | 1 | 23 |
| active human immunodeficiency virus | 1 | 492 |
| rotavirus gastroenteritis | 1 | 302 |
| tick-borne encephalitis | 4 | 18 (3-64) |

*Table S5 – MxA values in non-respiratory viral infections. MxA – Myxovirus resistance protein*
